# Supplementary material
Source: HighWire-hosted journal article supplement (https://learnmem.cshlp.org/content/suppl/2019/06/06/26.7.262)
Supplement: Supplemental_Methods_and_Results.docx [file Supplemental_Methods_and_Results.docx]

**SUPPLEMENTARY MATERIAL**

**Fronto-parietal contributions to episodic retrieval – evidence from neurodegenerative disorders**

Siddharth Ramanan1,2,3, Cherie Strikwerda-Brown1,2,3, Annu Mothakunnel1, John R. Hodges1,3,4, Olivier Piguet1,2,3, Muireann Irish1,2,3*

1The University of Sydney, Brain and Mind Centre, Sydney, New South Wales, Australia

2The University of Sydney, School of Psychology, Sydney, New South Wales, Australia

3ARC Centre of Excellence in Cognition and its Disorders, Sydney, New South Wales, Australia

4The University of Sydney, School of Medical Sciences, Sydney, New South Wales, Australia

***Corresponding author**: Associate Professor Muireann Irish, Brain and Mind Centre, The University of Sydney, 100 Mallett Street, Camperdown, NSW 2050, Sydney, Australia; Tel: +61 2 9114 4165; e-mail: [muireann.irish@sydney.edu.au](mailto:muireann.irish@sydney.edu.au)

**Supplementary Results**

*Neuropsychological test performance*

Significant group differences were noted on performance on a task of attention [digit span forward: *F*(3, 113) = 10.0, *p* < .001; = .20], with all patient groups performing significantly poorer than Controls (all *p* values < .001) but comparably to each other (all *p* values > .1). Significant group differences were further noted for working memory performance [digit span backward: *F*(3, 113) = 20.2, *p* < .0001; = .34], with all patient groups scoring significantly lower than Controls (all *p* values < .001) but comparably to each other (all *p* values > .1). Regarding executive function, significant group differences were noted on a task of set shifting [Trail Making Test (TMT) B-A: *F*(3, 89) = 16.7, *p* < .0001; = .36], reflecting the significantly poorer performance of patient groups relative to Controls (all *p* values < .05). No significant differences were found between CBS, PSP, and AD groups for set-switching (TMT B-A; all *p* values > .1). Significant group differences were also noted on a measure of inhibition [Hayling scaled score: *F*(3, 86) = 18.3, *p* < .0001; = .39] where all patient groups performed significantly poorer than Controls (all *p* values < .001) but comparably to each other (all *p* values > .1). Patient groups continued to perform significantly poorer than Controls for verbal fluency [FAS letter fluency: *F*(3, 94) = 40.2, *p* < .0001; = .56] (all *p* values < .001), with CBS scoring in line with AD and PSP (both *p* values > .1), whereas PSP performance was significantly worse than AD (*p* < .01). On a measure of global language processing (ACE-R language subdomain), significant group differences were noted [*F*(3, 118) = 13.3; *p* < .0001; = .25]. *Post-hoc* analyses revealed that all patient groups performed significantly poorer than Controls (all *p* values < .01), with no significant differences between the patient groups (all *p* values > .1). Finally, significant group differences were noted on visuospatial performance (ACE-R visuospatial: *F*(3, 118) = 11.1, *p* < .001; = .21) where all patient groups performed significantly poorer than Controls (all *p* values < .001) but comparably to each other (all *p* values > .1).

**Voxel-based Morphometry analyses**

*Group differences in grey matter intensity*

Patient groups displayed characteristic profiles of atrophy in keeping with their clinical diagnoses. Briefly, AD patients displayed significant atrophy in bilateral medial and lateral temporal, inferior parietal, posterior cingulate, and frontopolar regions. PSP patients presented with atrophy in bilateral orbitofrontal, insular, and cerebellar cortices, and left striatal regions. Finally, relative to Controls, both CBS-Impaired and CBS-Spared patients displayed significant atrophy in bilateral medial temporal (including hippocampus) and lateral temporal, inferior parietal, orbitofrontal, insular, striatal, and cerebellar regions (all *p* values < .05 corrected for Family-Wise Error). Direct comparison of the CBS subgroups revealed no significant differences in grey matter intensity.

*Grey matter correlates of delayed recall performance* *in CBS-Spared and PSP*

Only a small cluster (*k* = 108) in the left occipital cortices was found to correlate with delayed recall performance in the CBS-Spared subgroup, reflecting the finding of Control-level episodic delayed recall performance in this group. PSP memory performance was associated with grey matter intensity in bilateral prefrontal regions, the left anterior cingulate cortex, and the right precentral gyrus (Supplementary Table 5).

**Diffusion tensor imaging analyses**

*Group differences in fractional anisotropy (FA)*

Relative to Controls, characteristic profiles of FA decrease were observed in each patient group (see Supplementary Table 8). In both AD and PSP groups, similar patterns of FA reductions in bilateral cingulum (cingulate gyrus), inferior fronto-occipital fasciculus, inferior longitudinal fasciculus, superior longitudinal fasciculus, and uncinate fasciculus were present (both *p* values < .05 corrected for Family-Wise Error), in keeping with previous reports (Agosta et al. 2011; Whitwell et al. 2011). CBS-Impaired and CBS-Spared groups showed bilateral reductions in FA in the hippocampal and cingulate gyrus parts of the cingulum bundle, inferior fronto-occipital fasciculus, inferior and superior longitudinal fasciculi, uncinate fasciculus, and forceps major and minor bundles (Tovar-Moll et al. 2014) (*p* < .05 corrected for Family-Wise Error). Direct comparison of the CBS subgroups did not reveal any significant differences in white matter intensity at *p* < .05 FWE-corrected.

**Supplementary Table 1**. Episodic memory performance across all subcomponents of the ACE-R memory subscale for all groups.

|  | AD | CBS | PSP | Control | Magnitude of group effect  (*F*, values) | *Post-hoc* results (between patients) |
| --- | --- | --- | --- | --- | --- | --- |
| 3-item recall (%) | 32.1 (38.2) | 60.6 (33.1) | 78.3 (27.0) | 93.1 (33.1) | *F* = 20.96; = .34 | CBS = PSP; CBS, PSP > AD |
| Retrograde memory (%) | 52.5 (39.7) | 69.8 (27.2) | 81.2 (17.9) | 96.6 (8.7) | *F* = 13.91; = .26 | CBS = PSP = AD |
| Address learning (%) | 68.4 (33.1) | 88.9 (22.4) | 93.5 (10.8) | 99.5 (2.6) | *F* = 11.14; = .22 | CBS = PSP > AD |
| Address delayed recall (%) | 12.3 (24.9) | 58.4 (32.5) | 72.8 (23.5) | 85.7 (15.2) | *F* = 42.62; = .52 | CBS = PSP > AD |
| Address recognition (%) | 69.6 (24.8) | 85.0 (24.4) | 93.0 (11.7) | 96.5 (7.6) | *F* = 9.95; = .20 | CBS = PSP > AD |
| Total memory score (%) | 46.9 (22.2) | 73.7 (23.0) | 84.2 (12.5) | 93.8 (6.8) | *F* = 33.38; = .45 | CBS = PSP; CBS, PSP > AD |

*Note.* Mean and standard deviation depicted for each group; *F* = *F* statistics from ANOVA (for all variables, dfnumerator = 3 and dfdenominator = 118); = partial eta-squared values (effect size); AD = Alzheimer’s Disease; CBS = Corticobasal Syndrome; PSP = Progressive Supranuclear Palsy; ACE-R = Addenbrooke’s Cognitive Examination – Revised.

**Supplementary Table 2**. Episodic memory performance for CBS-Subgroups on the learning, delayed recall, and recognition components from the ACE-R memory subscale.

|  | CBS-Impaired | CBS-Spared | CBS-Impaired vs. Control | CBS-Impaired vs. AD | CBS-Impaired vs. CBS-Spared |
| --- | --- | --- | --- | --- | --- |
| Learning (%) | 81.1 (27.2) | 99.2 (3.2) | **.002** | .22 | **.01** |
| Delayed recall (%) | 35.4 (23.0) | 88.7 (11.2) | **< .001** | .44 | **< .001** |
| Recognition (%) | 74.4 (28.0) | 98.9 (4.5) | **< .001** | .78 | **< .001** |

*Note.* For *post-hoc* comparisons, *p* values bolded if *p* < .05 or lower. AD = Alzheimer’s Disease; CBS-Impaired = Corticobasal Syndrome-Impaired memory (< -1.5 *z*-score on delayed recall); CBS-Spared = Corticobasal Syndrome-Spared memory (≥ -1.5 *z*-score on the delayed recall); ACE-R = Addenbrooke’s Cognitive Examination – Revised.

**Supplementary Table 3**. Demographic, clinical assessment, and cognitive screening scores for CBS subgroups stratified by episodic memory performancea.

|  | CBS-Impaired | CBS-Spared | CBS-Impaired vs. CBS-Spared (*p*-values) |
| --- | --- | --- | --- |
| *N* | 25 | 19 |  |
| Sex (M:F) | 9:16 | 6:13 | .99† |
| Age (years) | 68.7 (6.4) | 72.3 (7.1) | .08 |
| Education (years) | 11.3 (3.9) | 11.5 (2.9) | .90 |
| Disease severity  (CDR-FTLD sum of boxes) | 7.4 (5.2) | 4.6 (3.9) | .08 |
| ACE-R modified scoreb (74) | 49.5 (14.7) | 57.5 (5.7) | **.01** |
| *Neuropsychological tests* |  |  |  |
| Digit span forward (16) | 8.7 (3.1) | 8.7 (2.4) | .99 |
| Digit span backward (16) | 4.6 (2.4) | 4.6 (1.4) | .99 |
| TMT B-A (secs) | 133.2 (76.8) | 171.0 (78.3) | .14 |
| Hayling overall scaled (10) | 4.0 (2.3) | 3.9 (1.8) | .93 |
| FAS letter fluency | 6.5 (4.5) | 6.7 (4.4) | .91 |
| ACE-R language (26) | 19.6 (5.0) | 21.6 (2.1) | .07 |
| ACE-R visuospatial (14) | 10.4 (4.2) | 12.4 (2.5) | .06 |
| 3-item recall (%) | 50.6 (32.0) | 73.6 (30.5) | **.02** |
| Retrograde memory (%) | 60.0 (27.9) | 82.8 (20.5) | **.003** |
| ACE-R total memory score (%) | 60.7 (22.2) | 90.8 (8.1) | **< .001** |

*Note*: Maximum test scores indicated in brackets. For each group, mean and standard deviation shown in brackets; *t*-tests employed for all comparisons except for † where chi-square test was employed; bolded *p* values indicate *p* < .05 or lower; aCBS-Impaired = Corticobasal Syndrome-Impaired memory (< -1.5 *z*-score relative to Controls on delayed recall); aCBS-Spared = Corticobasal Syndrome-Spared memory (≥ -1.5 *z*-score relative to Controls on the delayed recall); bACE-R modified score computed by subtracting the ACE-R total memory score from the ACE-R total; CDR-FTLD = Clinical Dementia Rating Frontotemporal Lobar Degeneration; ACE-R = Addenbrooke’s Cognitive Examination – Revised; TMT B-A = Trail Making Test parts B minus A.

**Supplementary Table 4**. Voxel-based morphometry results showing regions of significant grey matter intensity decrease in patient groups relative to Controls

| Contrast | Regions | Side | Number of voxels | Peak MNI coordinates | | | *t* value |
| --- | --- | --- | --- | --- | --- | --- | --- |
|  |  |  |  | x | y | z |  |
| AD | Hippocampus, amygdala, temporal fusiform cortex, temporal pole, frontal pole, anterior cingulate cortex, posterior cingulate cortex, supramarginal gyrus, angular gyrus, lateral occipital cortex, cerebellum | Bilateral | 98,492 | 30 | -12 | -50 | 3.78 |
| CBS-Impaired | Hippocampus, amygdala, caudate, nucleus accumbens, middle/superior temporal gyrus, temporal pole, insula, frontal pole, orbitofrontal cortex, superior/middle/inferior temporal gyrus, middle cingulate and posterior cingulate cortex, precentral gyrus, supramarginal gyrus, angular gyrus, lateral occipital cortex, cerebellum | Bilateral | 88,723 | -26 | -58 | -64 | 3.79 |
| CBS-Spared | Hippocampus, temporal fusiform cortex, nucleus accumbens, pallidum, putamen, middle/superior temporal gyrus, central opercular cortex, insula, frontal pole, orbitofrontal cortex, inferior frontal gyrus, precentral gyrus, superior parietal lobule, supramarginal gyrus, angular gyrus | Bilateral | 46,096 | -54 | -6 | 0 | 3.58 |
|  | Cerebellum, lateral occipital cortex, | Bilateral | 11,459 | -2 | -60 | -28 | 3.58 |
| PSP | Left caudate, left putamen, left temporal pole, left superior temporal gyrus, bilateral orbitofrontal cortex, insula, paracingulate cortex, cerebellum | Bilateral | 47,285 | 40 | -54 | -60 | 3.83 |
| CBS-Spared vs CBS-Impaired | No significant clusters |  |  |  |  |  |  |

*Note*. All clusters reported using threshold-free cluster enhancement method and corrected for Family-Wise Error (FWE) at *p* < .05 with a cluster threshold of 100 contiguous voxels. MNI = Montreal Neurological Institute; AD = Alzheimer’s Disease; CBS-Impaired = Corticobasal Syndrome-Impaired memory (< -1.5 *z*-score on delayed recall); CBS-Spared = Corticobasal Syndrome-Spared memory (≥ -1.5 *z*-score on the delayed recall); PSP = Progressive Supranuclear Palsy.**Supplementary Table 5**. Voxel-based morphometry results showing regions of significant grey matter intensity decrease that correlate with delayed recall performance in patients combined with Controls.

| Contrast | Regions | Side | Number of voxels | Peak MNI coordinates | | | *t* value |
| --- | --- | --- | --- | --- | --- | --- | --- |
|  |  |  |  | x | y | z |  |
| AD | Hippocampus, parahippocampal gyrus, amygdala, temporal fusiform cortex, inferior/middle/superior temporal gyrus, temporal pole, orbitofrontal cortex, supramarginal gyrus, angular gyrus, lateral occipital cortex | Left | 12,112 | -42 | -2 | -50 | 3.78 |
|  | Temporal fusiform cortex, inferior/middle/superior temporal gyrus, orbitofrontal cortex, supramarginal gyrus, angular gyrus, lateral occipital cortex | Right | 5,317 | 42 | -28 | -30 | 3.78 |
|  | Parahippocampal gyrus, hippocampus, amygdala | Right | 892 | 30 | -6 | -28 | 3.78 |
|  | Cerebellum | Bilateral | 744 | -20 | -76 | -40 | 3.78 |
|  | Frontal pole, anterior cingulate cortex | Bilateral | 737 | 14 | 66 | 6 | 3.78 |
|  | Posterior cingulate cortex | Bilateral | 400 | -16 | -30 | 36 | 3.78 |
|  | Anterior cingulate cortex | Bilateral | 383 | 4 | 4 | 46 | 3.78 |
|  | Lateral occipital cortex | Right | 373 | 32 | -76 | 18 | 3.78 |
|  | Paracingulate gyrus, medial frontal cortex | Bilateral | 359 | -10 | 40 | -6 | 3.78 |
|  | Lateral occipital cortex | Right | 162 | 18 | -74 | 48 | 3.78 |
|  | Middle frontal gyrus | Right | 138 | 30 | 14 | 40 | 3.78 |
|  | Inferior temporal gyrus | Right | 135 | 48 | -2 | -46 | 3.78 |
| CBS-Impaired | Hippocampus, amygdala, temporal fusiform cortex, putamen, pallidum, inferior temporal gyrus, temporal pole, supramarginal gyrus, angular gyrus | Left | 5,827 | -32 | 0 | -50 | 3.79 |
|  | Cerebellum, lateral occipital cortex | Bilateral | 4,904 | -32 | -58 | -62 | 3.79 |
|  | Posterior cingulate cortex, precuneus, postcentral gyrus, superior parietal lobule | Bilateral | 2,715 | 12 | -48 | 30 | 3.79 |
|  | Superior temporal gyrus, middle temporal gyrus, supramarginal gyrus | Right | 2,447 | 58 | -14 | -6 | 3.79 |
|  | Middle frontal gyrus, inferior frontal gyrus, precentral gyrus | Left | 1,502 | -38 | 14 | 30 | 3.79 |
|  | Frontal pole | Right | 1,086 | 22 | 46 | -20 | 3.79 |
|  | Lateral occipital cortex | Right | 464 | 40 | -74 | -14 | 3.79 |
|  | Precentral gyrus | Right | 431 | 40 | -6 | 48 | 3.56 |
|  | Superior parietal lobule, postcentral gyrus | Left | 293 | -30 | -50 | 60 | 3.79 |
|  | Orbitofrontal cortex, pallidum, amygdala, putamen | Right | 242 | 24 | 6 | -18 | 3.79 |
|  | Supramarginal gyrus, superior parietal lobule | Left | 186 | -48 | -40 | 40 | 3.79 |
|  | Parahippocampal gyrus, hippocampus | Right | 130 | 24 | -30 | -12 | 3.79 |
|  | Paracingulate cortex, medial frontal cortex | Left | 115 | -14 | 40 | -6 | 3.79 |
|  | Orbitofrontal cortex, inferior frontal gyrus | Right | 114 | 38 | 30 | -2 | 3.79 |
|  | Paracingulate gyrus, anterior cingulate cortex | Left | 109 | -10 | 34 | 24 | 3.79 |
| CBS-Spared | Occipital pole, lateral occipital cortex | Left | 108 | -24 | -102 | 14 | 3.81 |
| PSP | Postcentral gyrus, precentral gyrus | Right | 109 | -40 | -28 | 54 | 3.82 |
|  | Frontal pole | Left | 100 | -34 | 48 | -14 | 3.82 |
|  | Supplementary motor cortex, anterior cingulate cortex | Left | 100 | 0 | -4 | 48 | 3.82 |
|  | Frontal pole | Right | 100 | 40 | 52 | -14 | 3.82 |

*Note.* All clusters reported using voxel-wise contrasts, uncorrected at a strict threshold of *p* < .001. Age is included as a covariate in all contrasts. All clusters reported at *t* > 3.56 with a cluster threshold of 100 contiguous voxels. MNI = Montreal Neurological Institute; AD = Alzheimer’s disease; CBS-Impaired = Corticobasal Syndrome-Impaired memory subgroup (< -1.5 *z*-score on delayed recall); CBS-Spared = Corticobasal Syndrome-Spared memory subgroup (≥ -1.5 *z*-score on the delayed recall); PSP = Progressive Supranuclear Palsy.

**Supplementary Table 6**. Voxel-based morphometry results showing grey matter regions commonly implicated in delayed recall performance in AD and CBS-Impaired groups

| Contrast | Regions | Side | Number of voxels | Peak MNI coordinates | | |
| --- | --- | --- | --- | --- | --- | --- |
|  |  |  |  | x | y | z |
| Regions of overlap | Middle/superior temporal gyrus, supramarginal gyrus, angular gyrus | Left | 754 | -48 | -26 | -8 |
|  | Middle temporal gyrus, parietal operculum cortex, supramarginal gyrus, angular gyrus | Right | 688 | 48 | -44 | 10 |
|  | Hippocampus, amygdala, parahippocampal gyrus | Left | 620 | -18 | 2 | -20 |
|  | Temporal fusiform cortex, temporal pole | Left | 486 | -36 | -2 | -46 |
|  | Cerebellum | Left | 352 | -22 | -74 | -40 |
|  | Posterior cingulate cortex | Bilateral | 325 | -16 | -30 | 36 |
|  | Supplementary motor cortex, anterior cingulate cortex | Bilateral | 251 | -2 | 0 | 48 |
|  | Insular cortex, central opercular cortex | Left | 227 | -36 | -6 | 2 |
|  | Temporal pole | Left | 217 | -48 | 10 | -14 |
|  | Cerebellum | Right | 185 | 16 | -74 | -32 |
|  | Lateral occipital cortex, occipital pole | Left | 161 | -42 | -76 | -10 |
|  | Occipital pole | Right | 157 | 30 | -98 | -6 |

*Note*. All clusters reported using voxel-wise contrasts, uncorrected at a strict threshold of *p* < .001 with a cluster threshold of 100 contiguous voxels. MNI = Montreal Neurological Institute; AD = Alzheimer’s Disease; CBS-Impaired = Corticobasal Syndrome-Impaired memory subgroup (< -1.5 *z*-score on delayed recall).

**Supplementary Table 7**. Voxel-based morphometry results showing grey matter regions implicated in delayed recall performance exclusively in AD and CBS-Impaired groups

| Contrast | Regions | Side | Number of voxels | Peak MNI coordinates | | |
| --- | --- | --- | --- | --- | --- | --- |
|  |  |  |  | x | y | z |
| AD | Hippocampus, parahippocampal gyrus, amygdala, temporal fusiform cortex, inferior/middle/superior temporal gyrus, temporal pole, supramarginal gyrus, angular gyrus, lateral occipital cortex | Left | 7,934 | -40 | -4 | -50 |
|  | Middle temporal gyrus, supramarginal gyrus, angular gyrus, lateral occipital cortex, occipital pole | Right | 2,047 | 42 | -86 | -16 |
|  | Temporal fusiform cortex, inferior/superior temporal gyrus, temporal fusiform cortex | Right | 1,487 | 48 | -44 | -30 |
|  | Hippocampus, parahippocampal gyrus, amygdala, orbitofrontal cortex | Right | 634 | 30 | -6 | -28 |
|  | Anterior cingulate cortex, paracingulate gyrus | Bilateral | 464 | 14 | 36 | 14 |
|  | Lateral occipital cortex | Right | 373 | 30 | -74 | 16 |
|  | Medial frontal cortex, paracingulate gyrus, anterior cingulate cortex | Left | 278 | -12 | 38 | -10 |
|  | Temporal fusiform cortex, inferior temporal gyrus | Left | 269 | -40 | -20 | -20 |
|  | Insular cortex, central opercular cortex | Right | 208 | 44 | -12 | 4 |
|  | Supramarginal gyrus | Right | 204 | 64 | -34 | 22 |
|  | Inferior temporal gyrus, temporal fusiform cortex | Left | 135 | 42 | -2 | -50 |
|  | Lateral occipital cortex | Right | 127 | 18 | -74 | 46 |
|  | Middle frontal gyrus, superior frontal gyrus | Right | 122 | 28 | 12 | 40 |
|  | Parahippocampal gyrus, hippocampus, thalamus | Right | 107 | 34 | -40 | -6 |
| CBS-Impaired | Cerebellum, lateral occipital cortex | Bilateral | 4,071 | -28 | -56 | -64 |
|  | Hippocampus, parahippocampal gyrus, amygdala, putamen, pallidum, nucleus accumbens, caudate, temporal fusiform cortex, temporal pole, insular cortex, frontal pole, orbitofrontal cortex | Left | 2,570 | -34 | -6 | -50 |
|  | Posterior cingulate cortex, precuneus, postcentral gyrus, superior parietal lobule | Bilateral | 2,266 | 12 | -50 | 28 |
|  | Middle/superior temporal gyrus, temporal pole, central opercular cortex, insular cortex | Right | 1,367 | 60 | -10 | -8 |
|  | Precentral gyrus, postcentral gyrus, middle/inferior frontal gyrus | Left | 1,177 | -42 | -8 | 30 |
|  | Frontal pole, orbitofrontal cortex | Right | 811 | 16 | 44 | -20 |
|  | Precentral gyrus, middle/superior frontal gyrus | Right | 415 | 38 | -6 | 44 |
|  | Orbitofrontal cortex, insular cortex, putamen | Right | 148 | 22 | 12 | -16 |
|  | Superior parietal lobule | Left | 129 | -36 | -44 | 58 |
|  | Orbitofrontal cortex, frontal pole | Right | 114 | 38 | 32 | -8 |
|  | Paracingulate gyrus, anterior cingulate cortex | Right | 107 | 16 | 38 | 24 |

*Note*. All clusters reported using voxel-wise contrasts, uncorrected at a strict threshold of *p* < .001 with a cluster threshold of 100 contiguous voxels. MNI = Montreal Neurological Institute; AD = Alzheimer’s Disease; CBS-Impaired = Corticobasal Syndrome-Impaired memory subgroup (< -1.5 *z*-score on delayed recall).

**Supplementary Table 8**. Tract-based Spatial Statistics results showing regions of significant white matter intensity decrease in patient groups compared to Controls

| Contrast | Tracts | Side | Number of voxels | Peak MNI coordinates | | | *t* value |
| --- | --- | --- | --- | --- | --- | --- | --- |
|  |  |  |  | x | y | z |  |
| AD | Forceps major, cingulum (cingulate gyrus), cingulum (hippocampal part), inferior fronto-occipital fasciculus, inferior longitudinal fasciculus, superior longitudinal fasciculus, superior longitudinal fasciculus – temporal part | Bilateral | 20,925 | -17 | -43 | 7 | 2.26 |
|  | Corticospinal tract, anterior thalamic radiation | Left | 2,621 | -12 | -21 | -19 | 1.81 |
|  | Superior longitudinal fasciculus | Left | 829 | -54 | -37 | -12 | 1.71 |
|  | Forceps minor | Right | 398 | 13 | 55 | 19 | 1.69 |
|  | Corticospinal tract | Left | 301 | -11 | -34 | -40 | 1.71 |
|  | Cingulum | Right | 100 | 10 | -42 | 30 | 1.69 |
| CBS-Impaired | Forceps minor, anterior thalamic radiation, forceps major, cingulum (hippocampal part), cingulum (cingulate gyrus), inferior longitudinal fasciculus, inferior fronto-occipital fasciculus, superior longitudinal fasciculus, uncinate fasciculus, corticospinal tract | Bilateral | 52,580 | 13 | 33 | 3 | 3.09 |
|  | Anterior thalamic radiation, corticospinal tract | Bilateral | 4,923 | 11 | -54 | -32 | 1.94 |
| CBS-Spared | Body of the corpus callosum, splenium of the corpus callosum, cingulum (cingulate gyrus), forceps major, forceps minor, corticospinal tract, superior longitudinal fasciculus | Bilateral | 13,097 | 1 | 1 | 24 | 2.75 |
| PSP | Forceps minor, forceps minor, cingulum (cingulate gyrus), inferior fronto-occipital fasciculus, inferior longitudinal fasciculus, superior longitudinal fasciculus, superior longitudinal fasciculus – temporal part, uncinate fasciculus, anterior thalamic radiation, corticospinal tract | Bilateral | 65,092 | 12 | 31 | -10 | 3.03 |

*Note.* Diffusion weighted imaging data not available for 1 AD patient. All clusters reported using threshold-free cluster enhancement method and corrected for Family-Wise Error (FWE) at *p* < .05. MNI = Montreal Neurological Institute; AD = Alzheimer’s disease; CBS-Impaired = Corticobasal Syndrome-Impaired memory (< -1.5 *z*-score on delayed recall); CBS-Spared = Corticobasal Syndrome-Spared memory (≥ -1.5 *z*-score on the delayed recall); PSP = Progressive Supranuclear Palsy

**Supplementary Table 9**. Correlation coefficients (Pearson’s *r* values) showing associations between delayed recall performance and fractional anisotropy values for pre-selected white matter tracts of interest.

| Group | Cingulum (hippocampal part) | | Cingulum | | Inferior longitudinal fasciculus | | Superior longitudinal fasciculus | | Uncinate fasciculus | |
| --- | --- | --- | --- | --- | --- | --- | --- | --- | --- | --- |
|  | Left | Right | Left | Right | Left | Right | Left | Right | Left | Right |
| AD | 0.27 | -0.15 | 0.07 | 0.002 | -0.07 | -0.04 | 0.02 | 0.27 | 0.25 | 0.03 |
| CBS-Impaired | **0.50*** | **0.59**** | 0.41 | **0.42*** | 0.30 | 0.31 | **0.47*** | **0.46*** | 0.40 | 0.18 |
| CBS-Spared | -0.02 | -0.04 | 0.06 | 0.03 | -0.01 | -0.02 | 0.02 | -0.02 | 0.01 | -0.01 |
| PSP | -0.09 | -0.34 | -0.42 | -0.38 | -0.29 | -0.17 | -0.28 | -0.33 | -0.43 | -0.44 |
| Control | 0.03 | -0.25 | -0.06 | -0.04 | 0.16 | 0.25 | 0.003 | -0.18 | 0.12 | -0.08 |

*Note.* Correlations were corrected for multiple comparisons using false-discovery rate to control for Type-I error. AD = Alzheimer’s disease; CBS-Impaired = Corticobasal Syndrome-Impaired memory subgroup (< -1.5 *z*-score on delayed recall); CBS-Spared = Corticobasal Syndrome-Spared memory subgroup (≥ -1.5 *z*-score on the delayed recall); PSP = Progressive Supranuclear Palsy; *, *p* < .05; **, *p* < .01


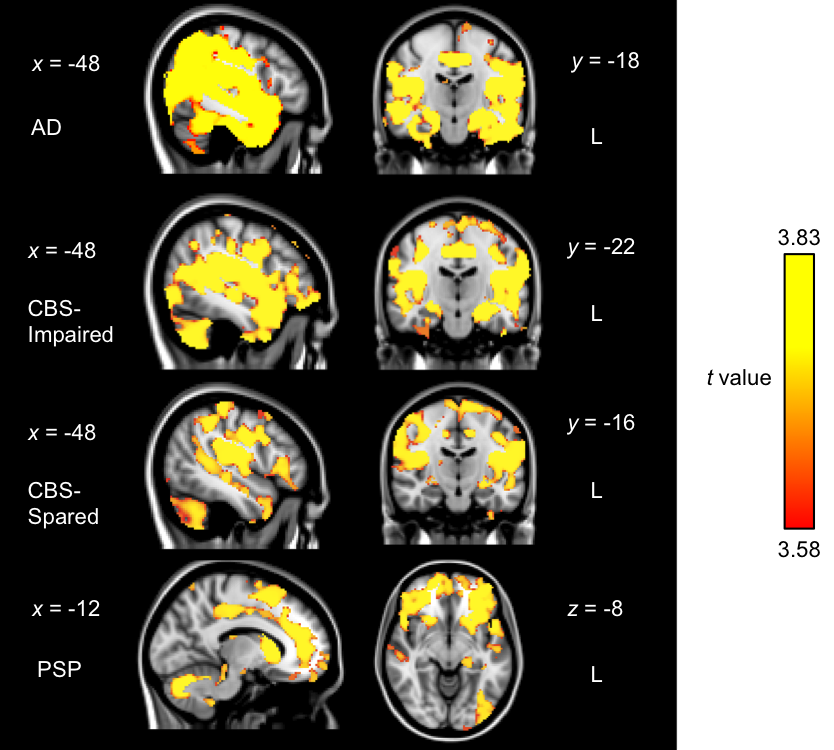


**Supplementary Fig 1.** Brain regions of significant grey matter intensity decrease in patient groups compared to Controls. All *x*, *y*, *z* co-ordinates reported are Montreal Neurological Institute (MNI) coordinates. Coloured voxels show regions that emerged as significant in the voxel-based morphometry analyses at *p* < .05 corrected for Family-Wise Error using threshold free cluster enhancement (TFCE) with a cluster threshold of 100 contiguous voxels. Age was included as a covariate in the analyses. Clusters are overlaid on the MNI standard brain; L = Left, AD = Alzheimer’s disease; CBS-Impaired, Corticobasal Syndrome-Impaired memory (< -1.5 *z*-score on delayed recall); CBS-Spared, Corticobasal Syndrome-Spared memory (≥ -1.5 *z*-score on delayed recall); PSP = Progressive Supranuclear Palsy.


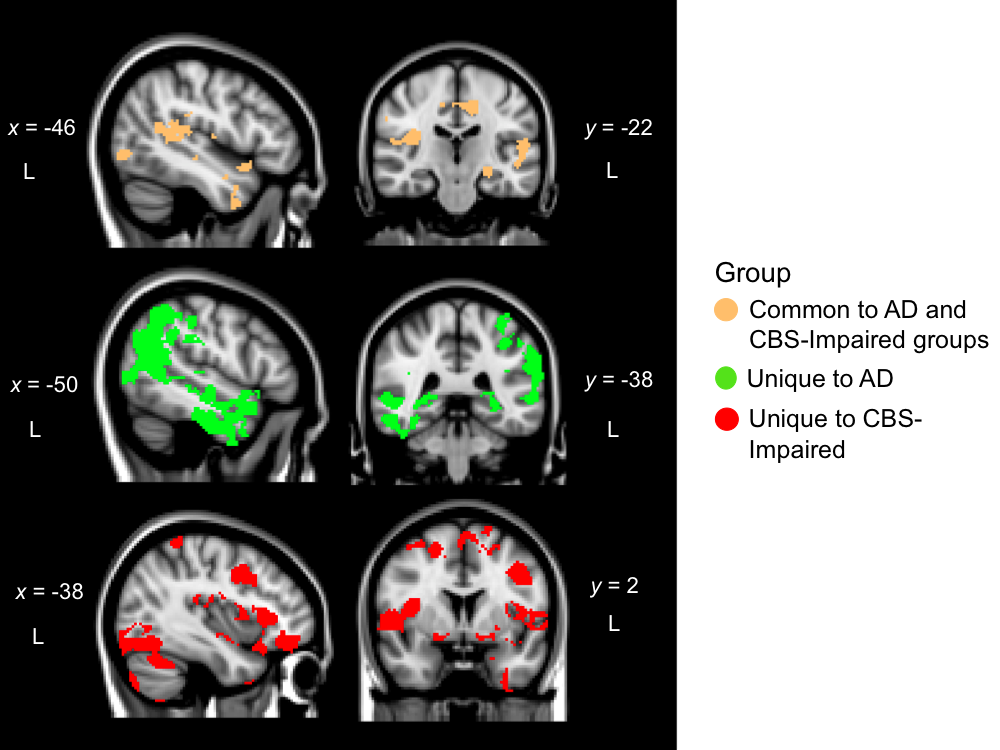


**Supplementary Fig 2.** Neural correlates of delayed recall performance common and unique to CBS-Impaired and AD groups. Coloured voxels show regions that emerged as significant in the voxel-based morphometry analyses at a strict uncorrected threshold of *p* < .001 with a cluster threshold of 100 contiguous voxels. All clusters reported at *t* > 3.56. Age was included as a covariate in the analyses. Clusters are overlaid on the MNI standard brain; L = Left; AD = Alzheimer’s disease; CBS-Impaired = Corticobasal Syndrome-Impaired memory subgroup (< -1.5 *z*-score on delayed recall).
